# Supplementary material for: Hydrothermal synthesis of Bi2WO6 with a new tungsten source and enhanced photocatalytic activity of Bi2WO6 hybridized with C3N4
Source: Royal Society of Chemistry journal article supplement (doi:10.1039/c8pp00078f), 2018-06-15
Supplement: c8pp00078f1.pdf [file c8pp00078f1.pdf]

## Supporting Information

Hydrothermal synthesis of  $\text{Bi}_2\text{WO}_6$  with a new tungsten source  
and enhanced photocatalytic activity of  $\text{Bi}_2\text{WO}_6$  hybridized with  
 $\text{C}_3\text{N}_4$

Peipei Yan,<sup>a</sup> Di Li,<sup>\*a</sup> Xinguo Ma,<sup>b</sup> Juanqin Xue,<sup>a</sup> Yujie Zhang,<sup>a</sup> Manbo Liu<sup>a</sup>

<sup>a</sup>School of Metallurgical Engineering, Xi'an University of Architecture and  
Technology, Xi'an, 710055, China

<sup>b</sup>School of Science, Hubei University of Technology, Wuhan, 430068, China

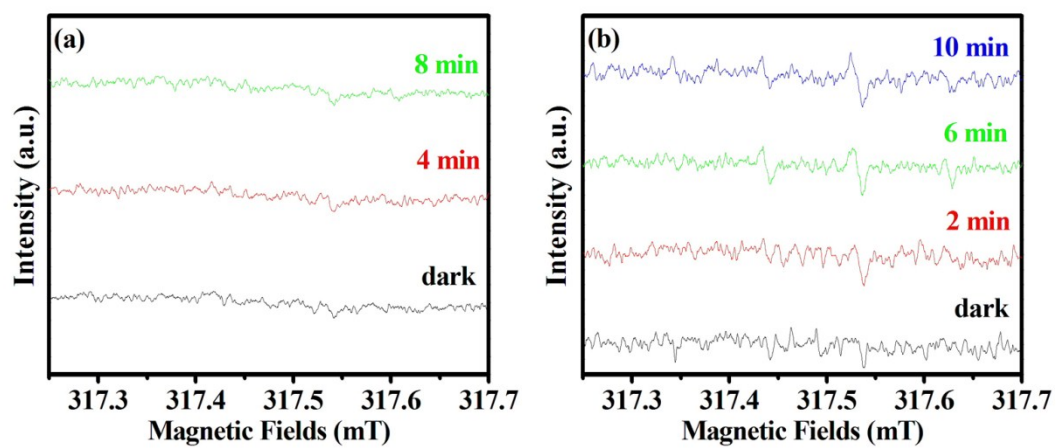

Fig. 1. EPR spectra of (a) DMPO- $\bullet\text{O}_2^-$  and (b) DMPO- $\bullet\text{OH}$  adducts of  $\text{Bi}_2\text{WO}_6$  in darkness and under visible light irradiation.

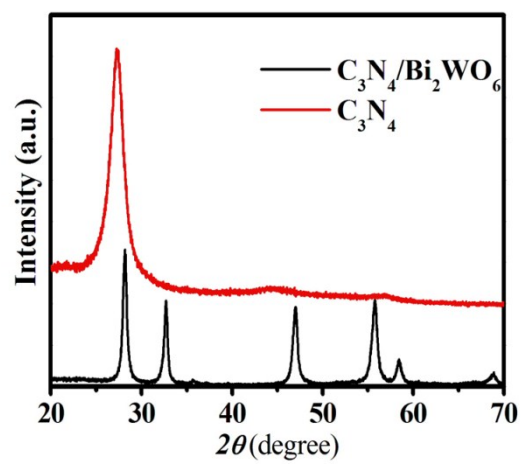

Fig. 2. XRD pattern of  $C_3N_4$  and  $C_3N_4/Bi_2WO_6$  (4%).

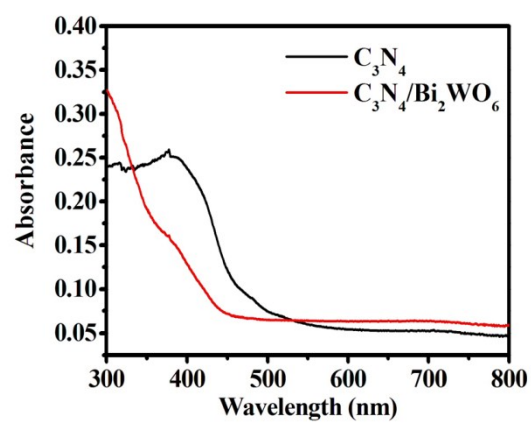

Fig. 3. The typical UV-vis DRS of  $C_3N_4$  and  $C_3N_4/Bi_2WO_6$  (12%).

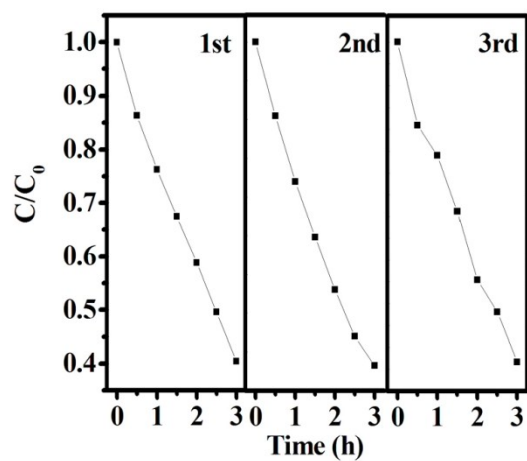

**Fig. 4** Cycling runs in the photocatalytic degradation of MB in the presence of  $C_3N_4/Bi_2WO_6$  (4%) under visible light irradiation;  $C_3N_4/Bi_2WO_6$  loading,  $0.5 \text{ g L}^{-1}$ ; initial concentration of MB,  $2 \times 10^{-5} \text{ M}$ .
